# Supplementary figures and images for: Prognostic and clinicopathological significance of pretreatment mean platelet volume in cancer: a meta-analysis
Source: HighWire-hosted journal article supplement (doi:10.1136/bmjopen-2020-037614), 2020-10-01

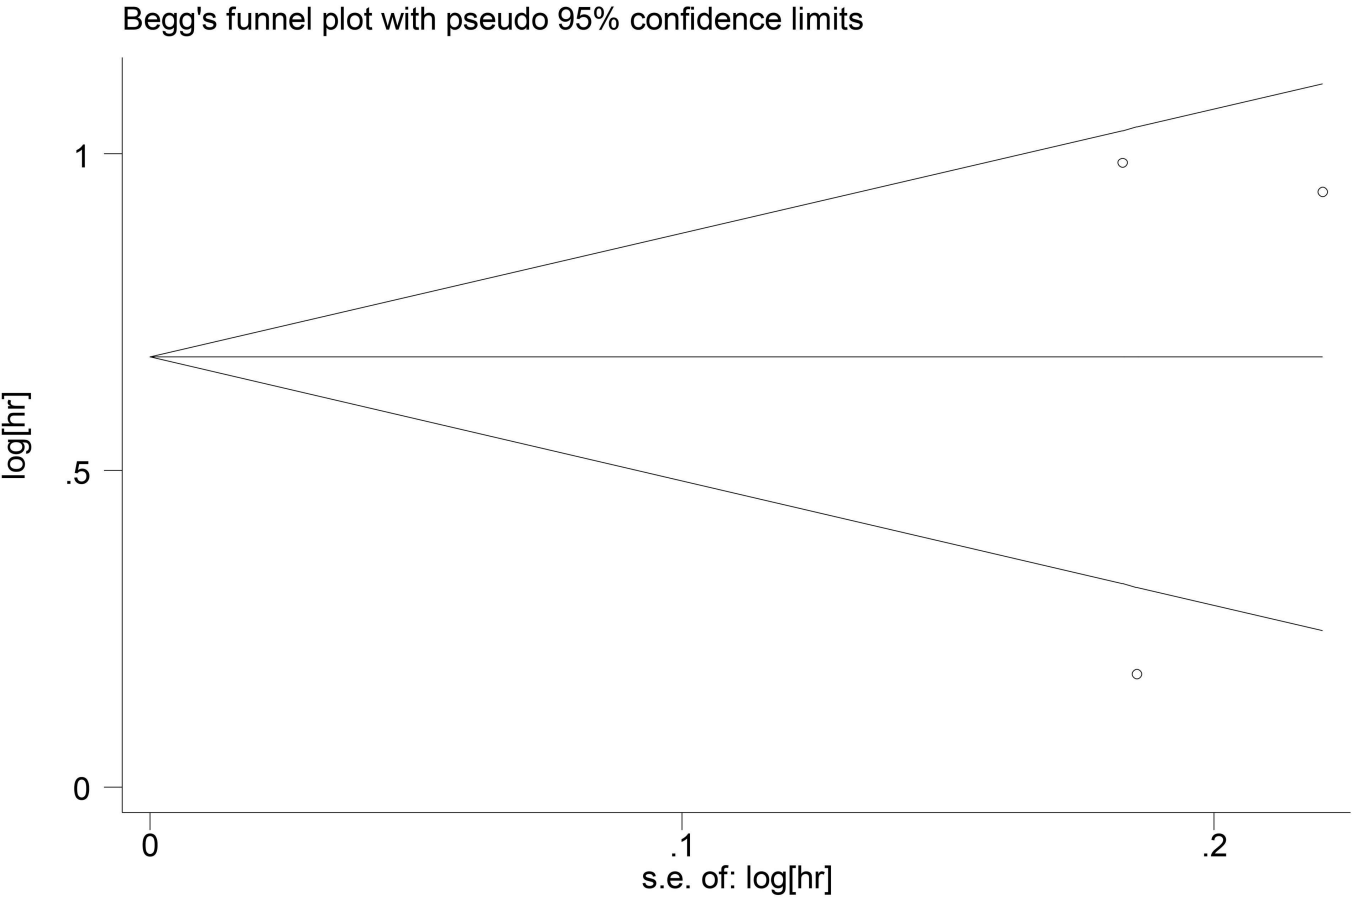

Supplement: bmjopen-2020-037614supp003_data_supplement.pdf [file bmjopen-2020-037614supp003_data_supplement.pdf]

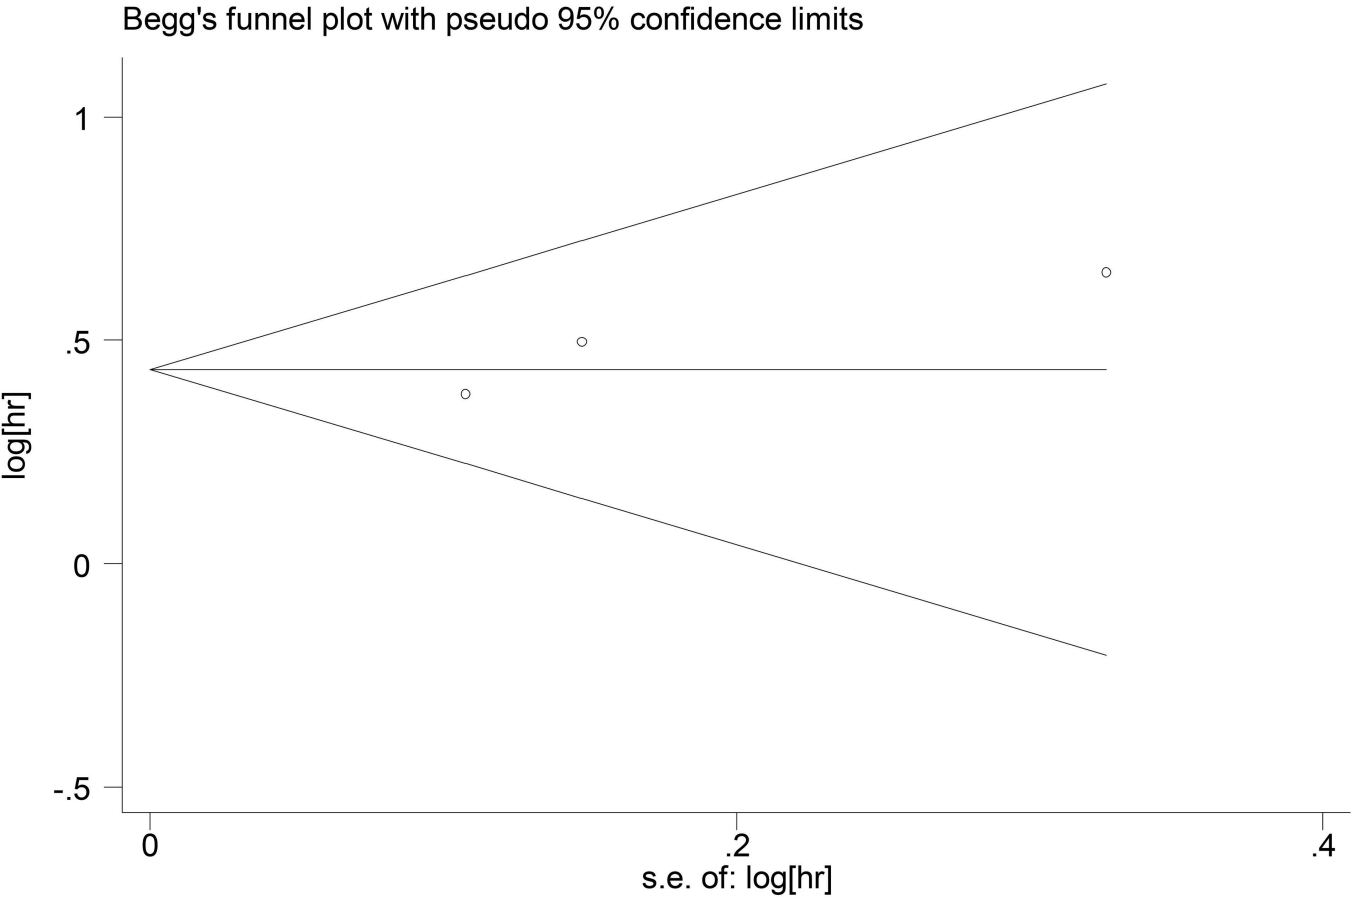

Supplement: bmjopen-2020-037614supp004_data_supplement.pdf [file bmjopen-2020-037614supp004_data_supplement.pdf]
